RATE RATIO ESTIMATES

-----  
name: <unnamed>  
log: C:\Users\mjasseh\.....\Childhood Mortality Indicators by  
Period - All - Stata 17.smcl  
log type: smcl  
opened on: 5 May 2022, 16:12:28

.  
. \*\*\* NEONATAL, INFANT & UNDER-5 \*\*\*\*\*  
. \*\*FARAFENNI  
. keep if site=="FFN"  
. \* PERIODIC COMPARISONS  
  
. stmh survey if age==0 & per==3

Failure \_d: endevent==1  
Analysis time \_t: (enddate-origin)/365.25  
Origin: time dob  
Enter on or after: time startdate  
ID variable: id  
Notes: age>5 trimmed  
year>26 trimmed

Mantel-Haenszel estimate of the rate ratio  
comparing survey==1 vs. survey==0

-----

| Rate ratio | chi2 | P>chi2 | [95% conf. interval] |       |
|------------|------|--------|----------------------|-------|
| 1.615      | 6.11 | 0.0134 | 1.100                | 2.371 |

-----

. stmh survey if age<1 & per==3  
  
Failure \_d: endevent==1  
Analysis time \_t: (enddate-origin)/365.25  
Origin: time dob  
Enter on or after: time startdate  
ID variable: id  
Notes: age>5 trimmed  
year>26 trimmed

Mantel-Haenszel estimate of the rate ratio  
comparing survey==1 vs. survey==0

-----

| Rate ratio | chi2 | P>chi2 | [95% conf. interval] |       |
|------------|------|--------|----------------------|-------|
| 1.232      | 2.18 | 0.1396 | 0.934                | 1.626 |

. stmh survey if age<5 & per==3

Failure \_d: endevent==1  
 Analysis time \_t: (enddate-origin)/365.25  
 Origin: time dob  
 Enter on or after: time startdate  
 ID variable: id  
 Notes: age>5 trimmed  
 year>26 trimmed

Mantel-Haenszel estimate of the rate ratio  
 comparing survey==1 vs. survey==0

| Rate ratio | chi2 | P>chi2 | [95% conf. interval] |       |
|------------|------|--------|----------------------|-------|
| 1.077      | 0.49 | 0.4843 | 0.875                | 1.326 |

.  
 . stmh survey if age==0 & per==4

Failure \_d: endevent==1  
 Analysis time \_t: (enddate-origin)/365.25  
 Origin: time dob  
 Enter on or after: time startdate  
 ID variable: id  
 Notes: age>5 trimmed  
 year>26 trimmed

Mantel-Haenszel estimate of the rate ratio  
 comparing survey==1 vs. survey==0

| Rate ratio | chi2  | P>chi2 | [95% conf. interval] |       |
|------------|-------|--------|----------------------|-------|
| 2.695      | 29.53 | 0.0000 | 1.857                | 3.912 |

. stmh survey if age<1 & per==4

Failure \_d: endevent==1  
 Analysis time \_t: (enddate-origin)/365.25  
 Origin: time dob  
 Enter on or after: time startdate

ID variable: id  
Notes: age>5 trimmed  
year>26 trimmed

Mantel-Haenszel estimate of the rate ratio  
comparing survey==1 vs. survey==0

| Rate ratio | chi2  | P>chi2 | [95% conf. interval] |       |
|------------|-------|--------|----------------------|-------|
| 1.710      | 15.22 | 0.0001 | 1.302                | 2.246 |

. stmh survey if age<5 & per==4

Failure \_d: endevent==1  
Analysis time \_t: (enddate-origin)/365.25  
Origin: time dob  
Enter on or after: time startdate  
ID variable: id  
Notes: age>5 trimmed  
year>26 trimmed

Mantel-Haenszel estimate of the rate ratio  
comparing survey==1 vs. survey==0

| Rate ratio | chi2 | P>chi2 | [95% conf. interval] |       |
|------------|------|--------|----------------------|-------|
| 1.365      | 7.87 | 0.0050 | 1.097                | 1.697 |

.  
. stmh survey if age==0 & per==5

Failure \_d: endevent==1  
Analysis time \_t: (enddate-origin)/365.25  
Origin: time dob  
Enter on or after: time startdate  
ID variable: id  
Notes: age>5 trimmed  
year>26 trimmed

Mantel-Haenszel estimate of the rate ratio  
comparing survey==1 vs. survey==0

| Rate ratio | chi2  | P>chi2 | [95% conf. interval] |       |
|------------|-------|--------|----------------------|-------|
| 2.361      | 34.07 | 0.0000 | 1.754                | 3.179 |

-----  
. stmh survey if age<1 & per==5

Failure \_d: endevent==1  
Analysis time \_t: (enddate-origin)/365.25  
Origin: time dob  
Enter on or after: time startdate  
ID variable: id  
Notes: age>5 trimmed  
year>26 trimmed

Mantel-Haenszel estimate of the rate ratio  
comparing survey==1 vs. survey==0

-----

| Rate ratio | chi2  | P>chi2 | [95% conf. interval] |       |
|------------|-------|--------|----------------------|-------|
| 1.727      | 21.20 | 0.0000 | 1.365                | 2.185 |

-----

. stmh survey if age<5 & per==5

Failure \_d: endevent==1  
Analysis time \_t: (enddate-origin)/365.25  
Origin: time dob  
Enter on or after: time startdate  
ID variable: id  
Notes: age>5 trimmed  
year>26 trimmed

Mantel-Haenszel estimate of the rate ratio  
comparing survey==1 vs. survey==0

-----

| Rate ratio | chi2  | P>chi2 | [95% conf. interval] |       |
|------------|-------|--------|----------------------|-------|
| 1.402      | 12.10 | 0.0005 | 1.158                | 1.698 |

-----

.  
.  
. \* ANNUAL COMPARISONS  
. stmh survey if age==0 & year==21

Failure \_d: endevent==1  
Analysis time \_t: (enddate-origin)/365.25  
Origin: time dob  
Enter on or after: time startdate  
ID variable: id

Notes: age>5 trimmed  
year>26 trimmed

Mantel-Haenszel estimate of the rate ratio  
comparing survey==1 vs. survey==0

| Rate ratio | chi2 | P>chi2 | [95% conf. interval] |       |
|------------|------|--------|----------------------|-------|
| 1.905      | 2.65 | 0.1038 | 0.865                | 4.198 |

. stmh survey if age<1 & year==21

Failure \_d: endevent==1  
Analysis time \_t: (enddate-origin)/365.25  
Origin: time dob  
Enter on or after: time startdate  
ID variable: id  
Notes: age>5 trimmed  
year>26 trimmed

Mantel-Haenszel estimate of the rate ratio  
comparing survey==1 vs. survey==0

| Rate ratio | chi2 | P>chi2 | [95% conf. interval] |       |
|------------|------|--------|----------------------|-------|
| 1.743      | 3.04 | 0.0811 | 0.926                | 3.282 |

. stmh survey if age<5 & year==21

Failure \_d: endevent==1  
Analysis time \_t: (enddate-origin)/365.25  
Origin: time dob  
Enter on or after: time startdate  
ID variable: id  
Notes: age>5 trimmed  
year>26 trimmed

Mantel-Haenszel estimate of the rate ratio  
comparing survey==1 vs. survey==0

| Rate ratio | chi2 | P>chi2 | [95% conf. interval] |       |
|------------|------|--------|----------------------|-------|
| 1.389      | 1.93 | 0.1645 | 0.872                | 2.213 |

```

.
. stmh survey if age==0 & year==22

      Failure _d: endevent==1
      Analysis time _t: (enddate-origin)/365.25
      Origin: time dob
      Enter on or after: time startdate
      ID variable: id
      Notes: age>5 trimmed
            year>26 trimmed

```

Mantel-Haenszel estimate of the rate ratio  
 comparing survey==1 vs. survey==0

| Rate ratio | chi2 | P>chi2 | [95% conf. interval] |       |
|------------|------|--------|----------------------|-------|
| 1.062      | 0.03 | 0.8620 | 0.540                | 2.090 |

```

. stmh survey if age<1 & year==22

      Failure _d: endevent==1
      Analysis time _t: (enddate-origin)/365.25
      Origin: time dob
      Enter on or after: time startdate
      ID variable: id
      Notes: age>5 trimmed
            year>26 trimmed

```

Mantel-Haenszel estimate of the rate ratio  
 comparing survey==1 vs. survey==0

| Rate ratio | chi2 | P>chi2 | [95% conf. interval] |       |
|------------|------|--------|----------------------|-------|
| 0.833      | 0.43 | 0.5112 | 0.482                | 1.439 |

```

. stmh survey if age<5 & year==22

      Failure _d: endevent==1
      Analysis time _t: (enddate-origin)/365.25
      Origin: time dob
      Enter on or after: time startdate
      ID variable: id
      Notes: age>5 trimmed
            year>26 trimmed

```

Mantel-Haenszel estimate of the rate ratio

comparing survey==1 vs. survey==0

| Rate ratio | chi2 | P>chi2 | [95% conf. interval] |       |
|------------|------|--------|----------------------|-------|
| 0.910      | 0.17 | 0.6765 | 0.583                | 1.420 |

.  
. stmh survey if age==0 & year==23

Failure \_d: endevent==1  
Analysis time \_t: (enddate-origin)/365.25  
Origin: time dob  
Enter on or after: time startdate  
ID variable: id  
Notes: age>5 trimmed  
year>26 trimmed

Mantel-Haenszel estimate of the rate ratio  
comparing survey==1 vs. survey==0

| Rate ratio | chi2 | P>chi2 | [95% conf. interval] |       |
|------------|------|--------|----------------------|-------|
| 2.473      | 7.50 | 0.0062 | 1.265                | 4.834 |

. stmh survey if age<1 & year==23

Failure \_d: endevent==1  
Analysis time \_t: (enddate-origin)/365.25  
Origin: time dob  
Enter on or after: time startdate  
ID variable: id  
Notes: age>5 trimmed  
year>26 trimmed

Mantel-Haenszel estimate of the rate ratio  
comparing survey==1 vs. survey==0

| Rate ratio | chi2 | P>chi2 | [95% conf. interval] |       |
|------------|------|--------|----------------------|-------|
| 1.851      | 5.43 | 0.0198 | 1.094                | 3.131 |

. stmh survey if age<5 & year==23

Failure \_d: endevent==1

Analysis time \_t: (enddate-origin)/365.25  
 Origin: time dob  
 Enter on or after: time startdate  
 ID variable: id  
 Notes: age>5 trimmed  
 year>26 trimmed

Mantel-Haenszel estimate of the rate ratio  
 comparing survey==1 vs. survey==0

| Rate ratio | chi2 | P>chi2 | [95% conf. interval] |       |
|------------|------|--------|----------------------|-------|
| 1.143      | 0.37 | 0.5403 | 0.745                | 1.755 |

.  
 . stmh survey if age==0 & year==24

Failure \_d: endevent==1  
 Analysis time \_t: (enddate-origin)/365.25  
 Origin: time dob  
 Enter on or after: time startdate  
 ID variable: id  
 Notes: age>5 trimmed  
 year>26 trimmed

Mantel-Haenszel estimate of the rate ratio  
 comparing survey==1 vs. survey==0

| Rate ratio | chi2 | P>chi2 | [95% conf. interval] |       |
|------------|------|--------|----------------------|-------|
| 1.227      | 0.32 | 0.5741 | 0.600                | 2.511 |

. stmh survey if age<1 & year==24

Failure \_d: endevent==1  
 Analysis time \_t: (enddate-origin)/365.25  
 Origin: time dob  
 Enter on or after: time startdate  
 ID variable: id  
 Notes: age>5 trimmed  
 year>26 trimmed

Mantel-Haenszel estimate of the rate ratio  
 comparing survey==1 vs. survey==0

-----

| Rate ratio | chi2 | P>chi2 | [95% conf. interval] |       |
|------------|------|--------|----------------------|-------|
| 1.090      | 0.09 | 0.7611 | 0.625                | 1.901 |

. stmh survey if age<5 & year==24

Failure \_d: endevent==1  
 Analysis time \_t: (enddate-origin)/365.25  
 Origin: time dob  
 Enter on or after: time startdate  
 ID variable: id  
 Notes: age>5 trimmed  
 year>26 trimmed

Mantel-Haenszel estimate of the rate ratio  
 comparing survey==1 vs. survey==0

| Rate ratio | chi2 | P>chi2 | [95% conf. interval] |       |
|------------|------|--------|----------------------|-------|
| 0.955      | 0.04 | 0.8473 | 0.598                | 1.526 |

.  
 . stmh survey if age==0 & year==25

Failure \_d: endevent==1  
 Analysis time \_t: (enddate-origin)/365.25  
 Origin: time dob  
 Enter on or after: time startdate  
 ID variable: id  
 Notes: age>5 trimmed  
 year>26 trimmed

Mantel-Haenszel estimate of the rate ratio  
 comparing survey==1 vs. survey==0

| Rate ratio | chi2  | P>chi2 | [95% conf. interval] |        |
|------------|-------|--------|----------------------|--------|
| 6.743      | 37.92 | 0.0000 | 3.335                | 13.630 |

. stmh survey if age<1 & year==25

Failure \_d: endevent==1  
 Analysis time \_t: (enddate-origin)/365.25  
 Origin: time dob  
 Enter on or after: time startdate

ID variable: id  
Notes: age>5 trimmed  
year>26 trimmed

Mantel-Haenszel estimate of the rate ratio  
comparing survey==1 vs. survey==0

| Rate ratio | chi2  | P>chi2 | [95% conf. interval] |       |
|------------|-------|--------|----------------------|-------|
| 3.836      | 31.83 | 0.0000 | 2.320                | 6.344 |

. stmh survey if age<5 & year==25

Failure \_d: endevent==1  
Analysis time \_t: (enddate-origin)/365.25  
Origin: time dob  
Enter on or after: time startdate  
ID variable: id  
Notes: age>5 trimmed  
year>26 trimmed

Mantel-Haenszel estimate of the rate ratio  
comparing survey==1 vs. survey==0

| Rate ratio | chi2  | P>chi2 | [95% conf. interval] |       |
|------------|-------|--------|----------------------|-------|
| 2.957      | 31.28 | 0.0000 | 1.984                | 4.405 |

```

. **BASSE
. keep if site=="BAS"
.
. * PERIODIC COMPARISONS

. stmh survey if age==0 & per==4

      Failure _d: endevent==1
      Analysis time _t: (enddate-origin)/365.25
      Origin: time dob
      Enter on or after: time startdate
      ID variable: id
      Notes: age>5 trimmed
            year>26 trimmed

```

Mantel-Haenszel estimate of the rate ratio  
 comparing survey==1 vs. survey==0

| Rate ratio | chi2 | P>chi2 | [95% conf. interval] |       |
|------------|------|--------|----------------------|-------|
| 1.666      | 8.45 | 0.0036 | 1.177                | 2.359 |

```

. stmh survey if age<1 & per==4

      Failure _d: endevent==1
      Analysis time _t: (enddate-origin)/365.25
      Origin: time dob
      Enter on or after: time startdate
      ID variable: id
      Notes: age>5 trimmed
            year>26 trimmed

```

Mantel-Haenszel estimate of the rate ratio  
 comparing survey==1 vs. survey==0

| Rate ratio | chi2 | P>chi2 | [95% conf. interval] |       |
|------------|------|--------|----------------------|-------|
| 1.293      | 4.70 | 0.0302 | 1.024                | 1.633 |

```

. stmh survey if age<5 & per==4

      Failure _d: endevent==1
      Analysis time _t: (enddate-origin)/365.25
      Origin: time dob
      Enter on or after: time startdate

```

ID variable: id  
Notes: age>5 trimmed  
year>26 trimmed

Mantel-Haenszel estimate of the rate ratio  
comparing survey==1 vs. survey==0

| Rate ratio | chi2 | P>chi2 | [95% conf. interval] |       |
|------------|------|--------|----------------------|-------|
| 1.004      | 0.00 | 0.9626 | 0.841                | 1.199 |

.  
. stmh survey if age==0 & per==5

Failure \_d: endevent==1  
Analysis time \_t: (enddate-origin)/365.25  
Origin: time dob  
Enter on or after: time startdate  
ID variable: id  
Notes: age>5 trimmed  
year>26 trimmed

Mantel-Haenszel estimate of the rate ratio  
comparing survey==1 vs. survey==0

| Rate ratio | chi2 | P>chi2 | [95% conf. interval] |       |
|------------|------|--------|----------------------|-------|
| 1.114      | 0.53 | 0.4661 | 0.833                | 1.489 |

. stmh survey if age<1 & per==5

Failure \_d: endevent==1  
Analysis time \_t: (enddate-origin)/365.25  
Origin: time dob  
Enter on or after: time startdate  
ID variable: id  
Notes: age>5 trimmed  
year>26 trimmed

Mantel-Haenszel estimate of the rate ratio  
comparing survey==1 vs. survey==0

| Rate ratio | chi2 | P>chi2 | [95% conf. interval] |       |
|------------|------|--------|----------------------|-------|
| 0.920      | 0.55 | 0.4583 | 0.737                | 1.147 |

-----  
. stmh survey if age<5 & per==5

Failure \_d: endevent==1  
Analysis time \_t: (enddate-origin)/365.25  
Origin: time dob  
Enter on or after: time startdate  
ID variable: id  
Notes: age>5 trimmed  
year>26 trimmed

Mantel-Haenszel estimate of the rate ratio  
comparing survey==1 vs. survey==0

-----  
Rate ratio            chi2            P>chi2            [95% conf. interval]  
-----  
0.893                1.75                0.1861                0.754                1.056  
-----

.  
. \* ANNUAL COMPARISONS  
stmh survey if age==0 & year==21

Failure \_d: endevent==1  
Analysis time \_t: (enddate-origin)/365.25  
Origin: time dob  
Enter on or after: time startdate  
ID variable: id  
Notes: age>5 trimmed  
year>26 trimmed

Mantel-Haenszel estimate of the rate ratio  
comparing survey==1 vs. survey==0

-----  
Rate ratio            chi2            P>chi2            [95% conf. interval]  
-----  
0.717                0.70                0.4012                0.329                1.564  
-----

. stmh survey if age<1 & year==21

Failure \_d: endevent==1  
Analysis time \_t: (enddate-origin)/365.25  
Origin: time dob  
Enter on or after: time startdate  
ID variable: id

Notes: age>5 trimmed  
year>26 trimmed

Mantel-Haenszel estimate of the rate ratio  
comparing survey==1 vs. survey==0

| Rate ratio | chi2 | P>chi2 | [95% conf. interval] |       |
|------------|------|--------|----------------------|-------|
| 0.582      | 3.47 | 0.0623 | 0.327                | 1.035 |

. stmh survey if age<5 & year==21

Failure \_d: endevent==1  
Analysis time \_t: (enddate-origin)/365.25  
Origin: time dob  
Enter on or after: time startdate  
ID variable: id  
Notes: age>5 trimmed  
year>26 trimmed

Mantel-Haenszel estimate of the rate ratio  
comparing survey==1 vs. survey==0

| Rate ratio | chi2 | P>chi2 | [95% conf. interval] |       |
|------------|------|--------|----------------------|-------|
| 0.642      | 4.43 | 0.0353 | 0.424                | 0.973 |

.  
. stmh survey if age==0 & year==22

Failure \_d: endevent==1  
Analysis time \_t: (enddate-origin)/365.25  
Origin: time dob  
Enter on or after: time startdate  
ID variable: id  
Notes: age>5 trimmed  
year>26 trimmed

Mantel-Haenszel estimate of the rate ratio  
comparing survey==1 vs. survey==0

| Rate ratio | chi2 | P>chi2 | [95% conf. interval] |       |
|------------|------|--------|----------------------|-------|
| 0.999      | 0.00 | 0.9975 | 0.499                | 2.000 |

```
. stmh survey if age<1 & year==22
```

```
Failure _d: endevent==1  
Analysis time _t: (enddate-origin)/365.25  
Origin: time dob  
Enter on or after: time startdate  
ID variable: id  
Notes: age>5 trimmed  
year>26 trimmed
```

```
Mantel-Haenszel estimate of the rate ratio  
comparing survey==1 vs. survey==0
```

| Rate ratio | chi2 | P>chi2 | [95% conf. interval] |       |
|------------|------|--------|----------------------|-------|
| 0.875      | 0.27 | 0.6014 | 0.529                | 1.446 |

```
. stmh survey if age<5 & year==22
```

```
Failure _d: endevent==1  
Analysis time _t: (enddate-origin)/365.25  
Origin: time dob  
Enter on or after: time startdate  
ID variable: id  
Notes: age>5 trimmed  
year>26 trimmed
```

```
Mantel-Haenszel estimate of the rate ratio  
comparing survey==1 vs. survey==0
```

| Rate ratio | chi2 | P>chi2 | [95% conf. interval] |       |
|------------|------|--------|----------------------|-------|
| 0.707      | 2.83 | 0.0926 | 0.471                | 1.061 |

```
.  
. stmh survey if age==0 & year==23
```

```
Failure _d: endevent==1  
Analysis time _t: (enddate-origin)/365.25  
Origin: time dob  
Enter on or after: time startdate  
ID variable: id  
Notes: age>5 trimmed  
year>26 trimmed
```

Mantel-Haenszel estimate of the rate ratio  
comparing survey==1 vs. survey==0

| Rate ratio | chi2 | P>chi2 | [95% conf. interval] |       |
|------------|------|--------|----------------------|-------|
| 1.417      | 1.15 | 0.2846 | 0.746                | 2.691 |

. stmh survey if age<1 & year==23

Failure \_d: endevent==1  
Analysis time \_t: (enddate-origin)/365.25  
Origin: time dob  
Enter on or after: time startdate  
ID variable: id  
Notes: age>5 trimmed  
year>26 trimmed

Mantel-Haenszel estimate of the rate ratio  
comparing survey==1 vs. survey==0

| Rate ratio | chi2 | P>chi2 | [95% conf. interval] |       |
|------------|------|--------|----------------------|-------|
| 0.894      | 0.20 | 0.6558 | 0.547                | 1.461 |

. stmh survey if age<5 & year==23

Failure \_d: endevent==1  
Analysis time \_t: (enddate-origin)/365.25  
Origin: time dob  
Enter on or after: time startdate  
ID variable: id  
Notes: age>5 trimmed  
year>26 trimmed

Mantel-Haenszel estimate of the rate ratio  
comparing survey==1 vs. survey==0

| Rate ratio | chi2 | P>chi2 | [95% conf. interval] |       |
|------------|------|--------|----------------------|-------|
| 0.933      | 0.15 | 0.6989 | 0.656                | 1.327 |

.  
. stmh survey if age==0 & year==24

```

Failure _d: endevent==1
Analysis time _t: (enddate-origin)/365.25
Origin: time dob
Enter on or after: time startdate
ID variable: id
Notes: age>5 trimmed
       year>26 trimmed

```

Mantel-Haenszel estimate of the rate ratio  
comparing survey==1 vs. survey==0

```

-----
Rate ratio      chi2      P>chi2      [95% conf. interval]
-----
1.456          1.84        0.1754      0.843      2.515
-----

```

. stmh survey if age<1 & year==24

```

Failure _d: endevent==1
Analysis time _t: (enddate-origin)/365.25
Origin: time dob
Enter on or after: time startdate
ID variable: id
Notes: age>5 trimmed
       year>26 trimmed

```

Mantel-Haenszel estimate of the rate ratio  
comparing survey==1 vs. survey==0

```

-----
Rate ratio      chi2      P>chi2      [95% conf. interval]
-----
1.238          0.88        0.3493      0.791      1.936
-----

```

. stmh survey if age<5 & year==24

```

Failure _d: endevent==1
Analysis time _t: (enddate-origin)/365.25
Origin: time dob
Enter on or after: time startdate
ID variable: id
Notes: age>5 trimmed
       year>26 trimmed

```

Mantel-Haenszel estimate of the rate ratio  
comparing survey==1 vs. survey==0

```

-----

```

| Rate ratio | chi2 | P>chi2 | [95% conf. interval] |       |
|------------|------|--------|----------------------|-------|
| 0.976      | 0.02 | 0.8987 | 0.675                | 1.412 |

.  
 . stmh survey if age==0 & year==25

Failure \_d: endevent==1  
 Analysis time \_t: (enddate-origin)/365.25  
 Origin: time dob  
 Enter on or after: time startdate  
 ID variable: id  
 Notes: age>5 trimmed  
 year>26 trimmed

Mantel-Haenszel estimate of the rate ratio  
 comparing survey==1 vs. survey==0

| Rate ratio | chi2 | P>chi2 | [95% conf. interval] |       |
|------------|------|--------|----------------------|-------|
| 0.935      | 0.04 | 0.8443 | 0.477                | 1.832 |

. stmh survey if age<1 & year==25

Failure \_d: endevent==1  
 Analysis time \_t: (enddate-origin)/365.25  
 Origin: time dob  
 Enter on or after: time startdate  
 ID variable: id  
 Notes: age>5 trimmed  
 year>26 trimmed

Mantel-Haenszel estimate of the rate ratio  
 comparing survey==1 vs. survey==0

| Rate ratio | chi2 | P>chi2 | [95% conf. interval] |       |
|------------|------|--------|----------------------|-------|
| 0.980      | 0.04 | 0.8412 | 0.640                | 1.730 |

. stmh survey if age<5 & year==25

Failure \_d: endevent==1  
 Analysis time \_t: (enddate-origin)/365.25  
 Origin: time dob  
 Enter on or after: time startdate

ID variable: id  
 Notes: age>5 trimmed  
 year>26 trimmed

Mantel-Haenszel estimate of the rate ratio  
 comparing survey==1 vs. survey==0

| Rate ratio | chi2 | P>chi2 | [95% conf. interval] |       |
|------------|------|--------|----------------------|-------|
| 1.317      | 2.21 | 0.1369 | 0.915                | 1.895 |

```
.
. ***CHILD MORTALITY ESTIMATES (per 1,000 pop)
.
. **FARAFENNI
. keep if site=="FFN"

. * PERIODIC COMPARISONS

. stmh survey if age<4 & per==3
```

```
      Failure _d: endevent==1
      Analysis time _t: (enddate-origin)/365.25
      Origin: time (dob+365.25)
Enter on or after: time startdate
      ID variable: id
      Notes: age>4 trimmed
      year>26 trimmed
```

Mantel-Haenszel estimate of the rate ratio  
 comparing survey==1 vs. survey==0

| Rate ratio | chi2 | P>chi2 | [95% conf. interval] |       |
|------------|------|--------|----------------------|-------|
| 0.779      | 2.30 | 0.1290 | 0.563                | 1.077 |

```
. stmh survey if age<4 & per==4

      Failure _d: endevent==1
      Analysis time _t: (enddate-origin)/365.25
      Origin: time (dob+365.25)
Enter on or after: time startdate
      ID variable: id
      Notes: age>4 trimmed
```

year>26 trimmed

Mantel-Haenszel estimate of the rate ratio  
comparing survey==1 vs. survey==0

| Rate ratio | chi2 | P>chi2 | [95% conf. interval] |       |
|------------|------|--------|----------------------|-------|
| 0.701      | 3.10 | 0.0782 | 0.471                | 1.043 |

. stmh survey if age<4 & per==5

Failure \_d: endevent==1  
Analysis time \_t: (enddate-origin)/365.25  
Origin: time (dob+365.25)  
Enter on or after: time startdate  
ID variable: id  
Notes: age>4 trimmed  
year>26 trimmed

Mantel-Haenszel estimate of the rate ratio  
comparing survey==1 vs. survey==0

| Rate ratio | chi2 | P>chi2 | [95% conf. interval] |       |
|------------|------|--------|----------------------|-------|
| 0.846      | 0.91 | 0.3401 | 0.599                | 1.194 |

.  
\*\*\*\*\*  
. \* ANNUAL COMPARISONS  
. stmh survey if age<4 & year==21

Failure \_d: endevent==1  
Analysis time \_t: (enddate-origin)/365.25  
Origin: time (dob+365.25)  
Enter on or after: time startdate  
ID variable: id  
Notes: age>4 trimmed  
year>26 trimmed

Mantel-Haenszel estimate of the rate ratio  
comparing survey==1 vs. survey==0

| Rate ratio | chi2 | P>chi2 | [95% conf. interval] |       |
|------------|------|--------|----------------------|-------|
| 0.945      | 0.02 | 0.8761 | 0.463                | 1.928 |

-----  
. stmh survey if age<4 & year==22

Failure \_d: endevent==1  
Analysis time \_t: (enddate-origin)/365.25  
Origin: time (dob+365.25)  
Enter on or after: time startdate  
ID variable: id  
Notes: age>4 trimmed  
year>26 trimmed

Mantel-Haenszel estimate of the rate ratio  
comparing survey==1 vs. survey==0

-----

| Rate ratio | chi2 | P>chi2 | [95% conf. interval] |       |
|------------|------|--------|----------------------|-------|
| 1.107      | 0.07 | 0.7952 | 0.512                | 2.394 |

-----

. stmh survey if age<4 & year==23

Failure \_d: endevent==1  
Analysis time \_t: (enddate-origin)/365.25  
Origin: time (dob+365.25)  
Enter on or after: time startdate  
ID variable: id  
Notes: age>4 trimmed  
year>26 trimmed

Mantel-Haenszel estimate of the rate ratio  
comparing survey==1 vs. survey==0

-----

| Rate ratio | chi2 | P>chi2 | [95% conf. interval] |       |
|------------|------|--------|----------------------|-------|
| 0.375      | 4.87 | 0.0274 | 0.151                | 0.929 |

-----

. stmh survey if age<4 & year==24

Failure \_d: endevent==1  
Analysis time \_t: (enddate-origin)/365.25  
Origin: time (dob+365.25)  
Enter on or after: time startdate  
ID variable: id  
Notes: age>4 trimmed  
year>26 trimmed

Mantel-Haenszel estimate of the rate ratio  
comparing survey==1 vs. survey==0

| Rate ratio | chi2 | P>chi2 | [95% conf. interval] |       |
|------------|------|--------|----------------------|-------|
| 0.631      | 1.03 | 0.3096 | 0.257                | 1.547 |

. stmh survey if age<4 & year==25

Failure \_d: endevent==1  
Analysis time \_t: (enddate-origin)/365.25  
Origin: time (dob+365.25)  
Enter on or after: time startdate  
ID variable: id  
Notes: age>4 trimmed  
year>26 trimmed

Mantel-Haenszel estimate of the rate ratio  
comparing survey==1 vs. survey==0

| Rate ratio | chi2 | P>chi2 | [95% conf. interval] |       |
|------------|------|--------|----------------------|-------|
| 1.355      | 0.70 | 0.4035 | 0.662                | 2.772 |

.

. \*\*BASSE  
. keep if site=="BAS"

. \* PERIODIC COMPARISONS  
. stmh survey if age<4 & per==4

Failure \_d: endevent==1  
Analysis time \_t: (enddate-origin)/365.25  
Origin: time (dob+365.25)  
Enter on or after: time startdate  
ID variable: id  
Notes: age>4 trimmed  
year>26 trimmed

Mantel-Haenszel estimate of the rate ratio  
comparing survey==1 vs. survey==0

| Rate ratio | chi2 | P>chi2 | [95% conf. interval] |       |
|------------|------|--------|----------------------|-------|
| 0.660      | 8.30 | 0.0040 | 0.496                | 0.877 |

. stmh survey if age<4 & per==5

Failure \_d: endevent==1  
 Analysis time \_t: (enddate-origin)/365.25  
 Origin: time (dob+365.25)  
 Enter on or after: time startdate  
 ID variable: id  
 Notes: age>4 trimmed  
 year>26 trimmed

Mantel-Haenszel estimate of the rate ratio  
 comparing survey==1 vs. survey==0

| Rate ratio | chi2 | P>chi2 | [95% conf. interval] |       |
|------------|------|--------|----------------------|-------|
| 0.815      | 2.39 | 0.1222 | 0.629                | 1.057 |

.

. \* ANNUAL COMPARISONS

. stmh survey if age<4 & year==21

Failure \_d: endevent==1  
 Analysis time \_t: (enddate-origin)/365.25  
 Origin: time (dob+365.25)  
 Enter on or after: time startdate  
 ID variable: id  
 Notes: age>4 trimmed  
 year>26 trimmed

Mantel-Haenszel estimate of the rate ratio  
 comparing survey==1 vs. survey==0

| Rate ratio | chi2 | P>chi2 | [95% conf. interval] |       |
|------------|------|--------|----------------------|-------|
| 0.674      | 1.68 | 0.1949 | 0.370                | 1.229 |

. stmh survey if age<4 & year==22

```

Failure _d: endevent==1
Analysis time _t: (enddate-origin)/365.25
Origin: time (dob+365.25)
Enter on or after: time startdate
ID variable: id
Notes: age>4 trimmed
year>26 trimmed

```

Mantel-Haenszel estimate of the rate ratio  
comparing survey==1 vs. survey==0

```

-----
Rate ratio      chi2      P>chi2      [95% conf. interval]
-----
0.470          4.65      0.0311      0.233      0.949
-----

```

. stmh survey if age<4 & year==23

```

Failure _d: endevent==1
Analysis time _t: (enddate-origin)/365.25
Origin: time (dob+365.25)
Enter on or after: time startdate
ID variable: id
Notes: age>4 trimmed
year>26 trimmed

```

Mantel-Haenszel estimate of the rate ratio  
comparing survey==1 vs. survey==0

```

-----
Rate ratio      chi2      P>chi2      [95% conf. interval]
-----
0.967          0.02      0.8971      0.582      1.606
-----

```

. stmh survey if age<4 & year==24

```

Failure _d: endevent==1
Analysis time _t: (enddate-origin)/365.25
Origin: time (dob+365.25)
Enter on or after: time startdate
ID variable: id
Notes: age>4 trimmed
year>26 trimmed

```

Mantel-Haenszel estimate of the rate ratio  
comparing survey==1 vs. survey==0

```

-----

```

| Rate ratio | chi2 | P>chi2 | [95% conf. interval] |       |
|------------|------|--------|----------------------|-------|
| 0.589      | 2.37 | 0.1235 | 0.298                | 1.164 |

. stmh survey if age<4 & year==25

Failure \_d: endevent==1  
 Analysis time \_t: (enddate-origin)/365.25  
 Origin: time (dob+365.25)  
 Enter on or after: time startdate  
 ID variable: id  
 Notes: age>4 trimmed  
 year>26 trimmed

Mantel-Haenszel estimate of the rate ratio  
 comparing survey==1 vs. survey==0

| Rate ratio | chi2 | P>chi2 | [95% conf. interval] |       |
|------------|------|--------|----------------------|-------|
| 1.620      | 3.14 | 0.0762 | 0.946                | 2.774 |

.  
 end of do-file

. log close  
 name: <unnamed>  
 log: C:\Users\mjasseh\.....\Childhood Mortality Indicators by  
 Period - All - Stata 17.smcl  
 log type: smcl  
 closed on: 5 May 2022, 16:13:12
